# Supplementary material for: Electronic and local structural changes with lithium-ion insertion in TiO2-B: X-ray absorption spectroscopy study
Source: Royal Society of Chemistry journal article supplement (doi:10.1039/c1jm11335f), 2011-01-01
Supplement: c1jm11335f.pdf [file c1jm11335f.pdf]

*Supporting Information*

**Electronic and Local Structural Change with Lithium-Ion Insertion in TiO<sub>2</sub>-B:**

**X-ray Absorption Spectroscopy Study**

Toyoki Okumura,<sup>a</sup> Tomokazu Fukutsuka,<sup>b</sup> Asuki Yanagihara,<sup>a</sup> Yuki Orikasa,<sup>c</sup> Hajime Arai,<sup>c</sup>  
Zempachi Ogumi,<sup>c</sup> and Yoshiharu Uchimoto<sup>a</sup>

<sup>a</sup> *Department of Interdisciplinary Environment, Graduate School of Engineering, Kyoto University, Nishikyo-ku, Kyoto 615-8510, Japan*

<sup>b</sup> *Department of Interdisciplinary Environment, Graduate School of Human and Environmental Studies, Kyoto University, Yoshida-nihonmatsu-cho, Sakyo-ku, Kyoto 606-8501, Japan,*

<sup>c</sup> *Society-Academia Collaboration for Innovation, Kyoto University, Nishikyo-ku, Kyoto 615-8510, Japan*

Table S1 Calculated parameters estimated from Ti *K*-edge EXAFS spectra for  $\text{Li}_x\text{TiO}_2$  ( $x = 0, 0.13, 0.26, 0.40, 0.53, 0.67$ ): interatomic distance ( $R$ ) and Debye Waller factor ( $\sigma$ ). Coordination number ( $CN$ ) was fixed at fitting

|                                    | Ti-O |                |                     | Ti-Ti(edge) |                |                     | Ti-Ti(corner) |                |                     | Residue(%) |
|------------------------------------|------|----------------|---------------------|-------------|----------------|---------------------|---------------|----------------|---------------------|------------|
|                                    | CN   | $R/\text{\AA}$ | $\sigma/\text{\AA}$ | CN          | $R/\text{\AA}$ | $\sigma/\text{\AA}$ | CN            | $R/\text{\AA}$ | $\sigma/\text{\AA}$ |            |
| $\text{Li}_x\text{TiO}_2\text{-B}$ |      |                |                     |             |                |                     |               |                |                     |            |
| $x = 0$                            | 6    | 1.939(8)       | 0.120(11)           | 5           | 3.158(15)      | 0.102(19)           | 4             | 3.386(11)      | 0.061(20)           | 2.674      |
| $x = 0.13$                         | 6    | 1.948(8)       | 0.121(11)           | 5           | 3.165(14)      | 0.101(19)           | 4             | 3.391(11)      | 0.064(20)           | 3.359      |
| $x = 0.26$                         | 6    | 1.961(7)       | 0.123(11)           | 5           | 3.176(14)      | 0.103(18)           | 4             | 3.408(13)      | 0.078(20)           | 3.516      |
| $x = 0.40$                         | 6    | 1.960(7)       | 0.125(11)           | 5           | 3.178(14)      | 0.103(17)           | 4             | 3.409(13)      | 0.079(20)           | 3.272      |
| $x = 0.53$                         | 6    | 1.985(8)       | 0.130(11)           | 5           | 3.206(14)      | 0.108(16)           | 4             | 3.480(21)      | 0.103(23)           | 4.837      |
| $x = 0.67$                         | 6    | 2.014(9)       | 0.145(12)           | 5           | 3.219(13)      | 0.116(15)           | 4             | 3.521(19)      | 0.108(22)           | 9.863      |

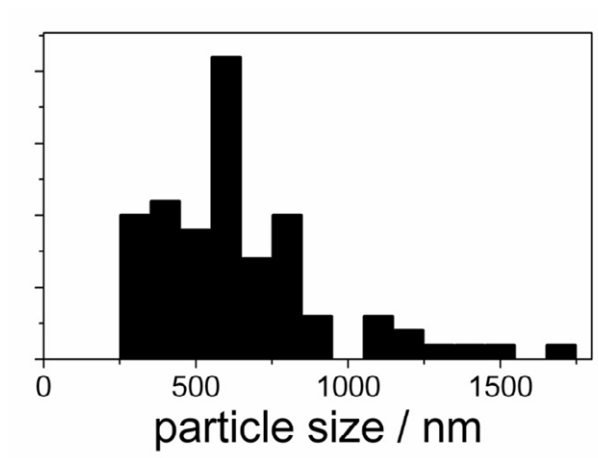

Figure S1. Size distribution of TiO<sub>2</sub>-B estimated by SEM image
